# Supplementary material for: Decoding Functional High-Density Lipoprotein Particle Surfaceome Interactions
Source: MDPI journal article supplement (doi:10.3390/ijms23169506), 2022-08-22
Supplement: s1 [file s1]

# Supplemental Materials

## Decoding Functional High-Density Lipoprotein Particle Surfaceome Interactions

Kathrin Frey <sup>1,2,†</sup>, Sandra Goetze <sup>1,3,4,\*,†</sup>, Lucia Rohrer <sup>2</sup>, Arnold von Eckardstein <sup>2</sup>  
and Bernd Wollscheid <sup>1,3,\*</sup>

<sup>1</sup> Institute of Translational Medicine, Department of Health Sciences and Technology, ETH Zurich, 8093 Zurich, Switzerland

<sup>2</sup> Institute for Clinical Chemistry, University Hospital Zurich, 8091 Zurich, Switzerland

<sup>3</sup> Swiss Institute of Bioinformatics (SIB), 1015 Lausanne, Switzerland

<sup>4</sup> ETH PHRT Swiss Multi-Omics Center (SMOC), 8093 Zurich, Switzerland

\* Correspondence: [sandra.goetze@hest.ethz.ch](mailto:sandra.goetze@hest.ethz.ch) (S.G.); [bernd.wollscheid@hest.ethz.ch](mailto:bernd.wollscheid@hest.ethz.ch) (B.W.);

Tel: +41-44-633-3001 (S.G.)

† These authors contributed equally to this work.



## Supplementary Tables:

**Table S1.** List of identified peptides in auto-CSC experiments with EA.hy926 cells, HAECs, HEPG2 cells, THP1 cells, activated THP1 cells, and foam cells. Identifications are filtered for FDR < 0.01 and NxS/T motifs.

**Table S2.** Matrix of all identified proteins in auto-CSC experiments with EA.hy926 cells, HAECs, HEPG2 cells, THP1 cells, activated THP1 cells, and foam cells.

**Table S3.** List of ranked and scaled protein abundances and the peptide counts (used for quantification) captured in auto-CSC experiments with EA.hy926 cells, HAECs, HEPG2 cells, THP1 cells, activated THP1 cells, and foam cells.

**Table S4.** Safequant output of the auto-CSC experiments quantitatively comparing VEGF-A treated vs untreated HAEC surfaceomes.

**Table S5.** Statistics from the Gene Ontology analysis of genes regulated by VEGF-A in HAECs.

**Table S6.** Gene Ontology protein annotation of the analysis of VEGF-A-sensitive proteins on HAECs.

**Table S7.** Protein content of rHDL as identified by COMET. Peptide and protein identifications were filtered with an FDR of 1%. Common contaminants and keratins were removed from the protein list.

**Table S8.** Safequant output of the HATRIC-LRC experiment with APOA1, lipidated APOA1, and HDL as ligands on EA.hy926 cells.



Supplementary Figures:

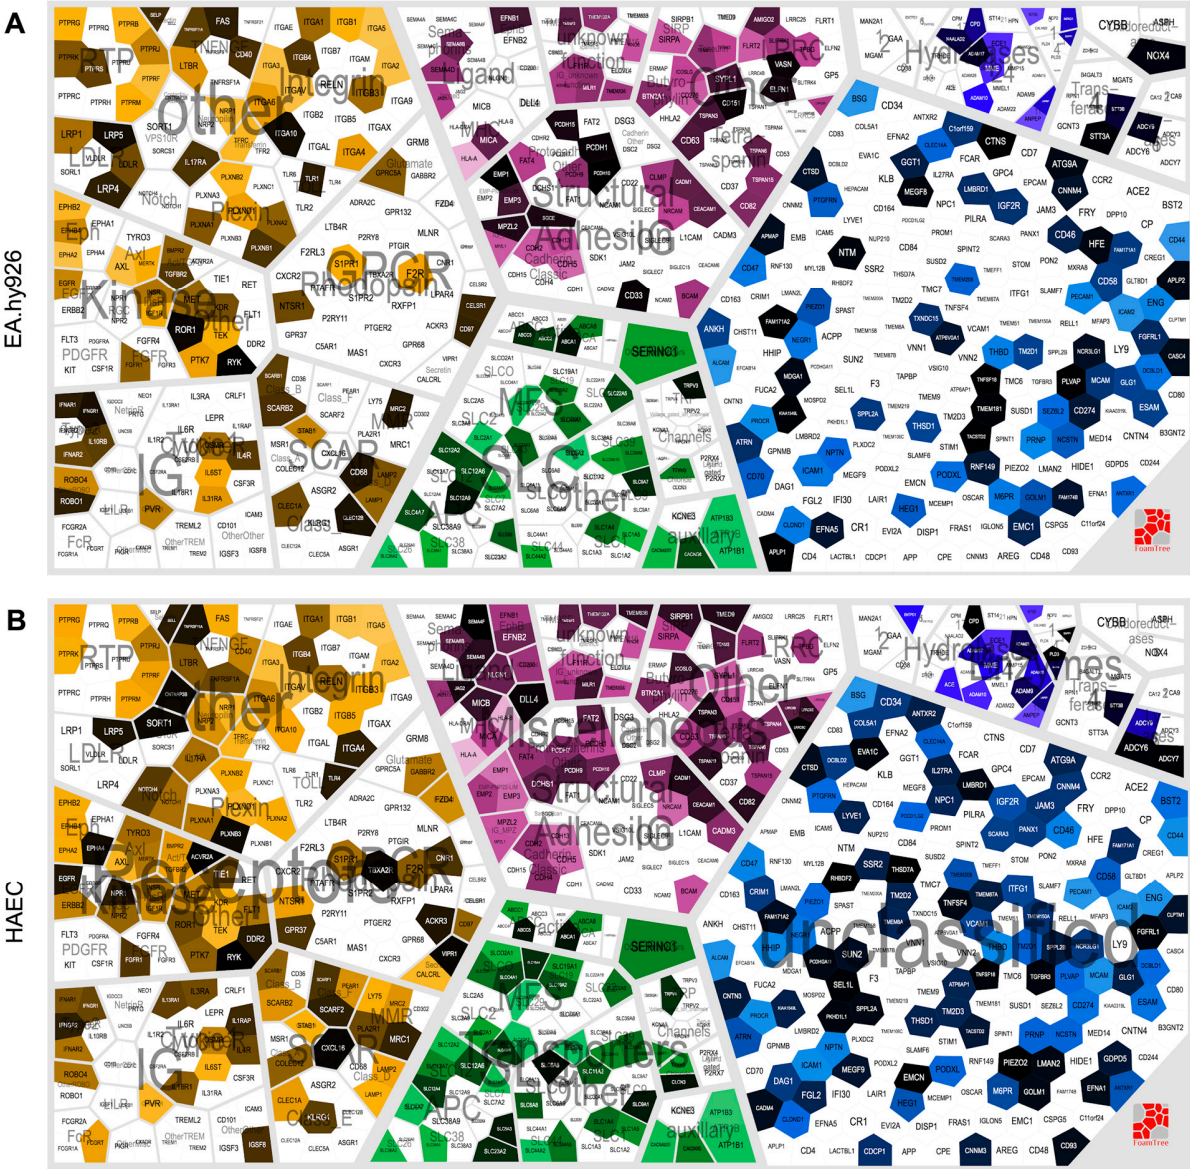



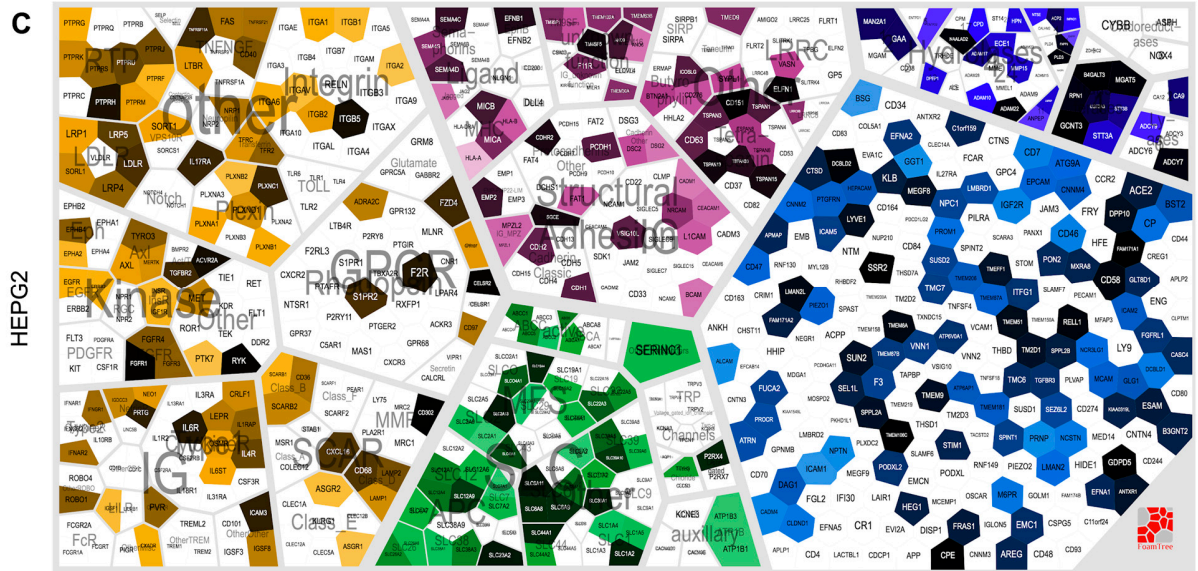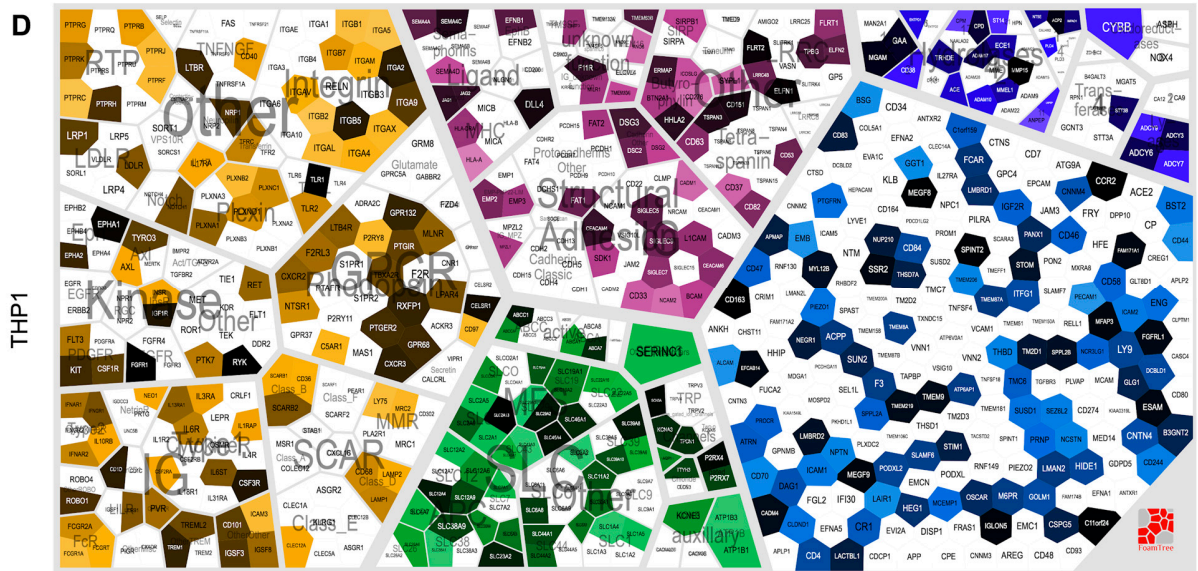







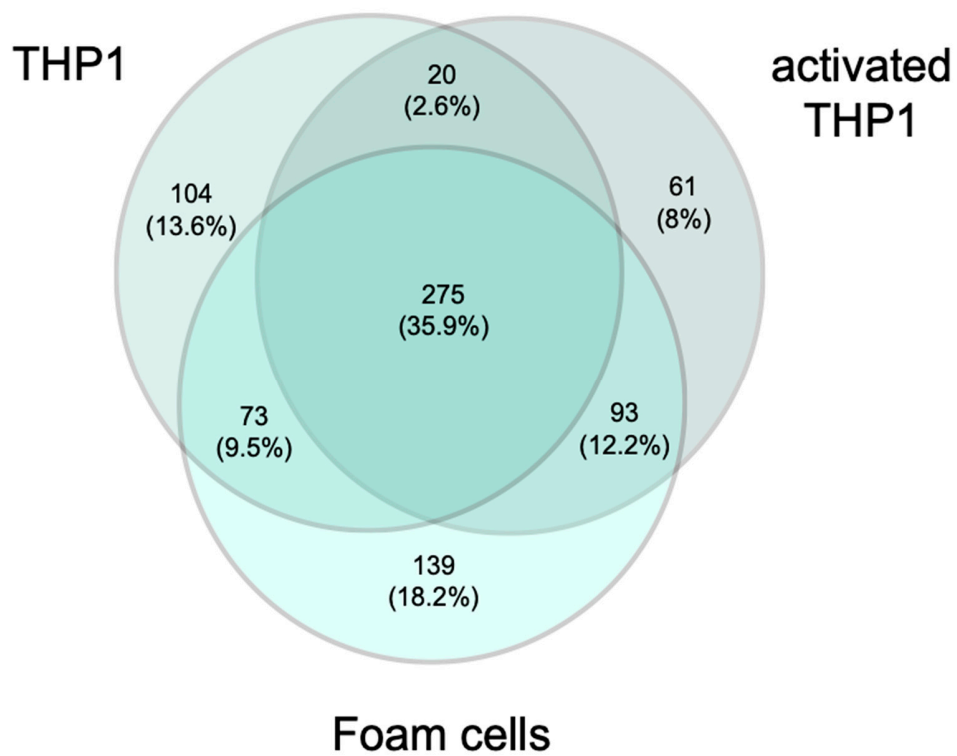

**Figure S2.** Venn diagram of overlap of identified proteins in the auto-CSC experiments with THP1 cells, activated THP1 cells, and foam cells.



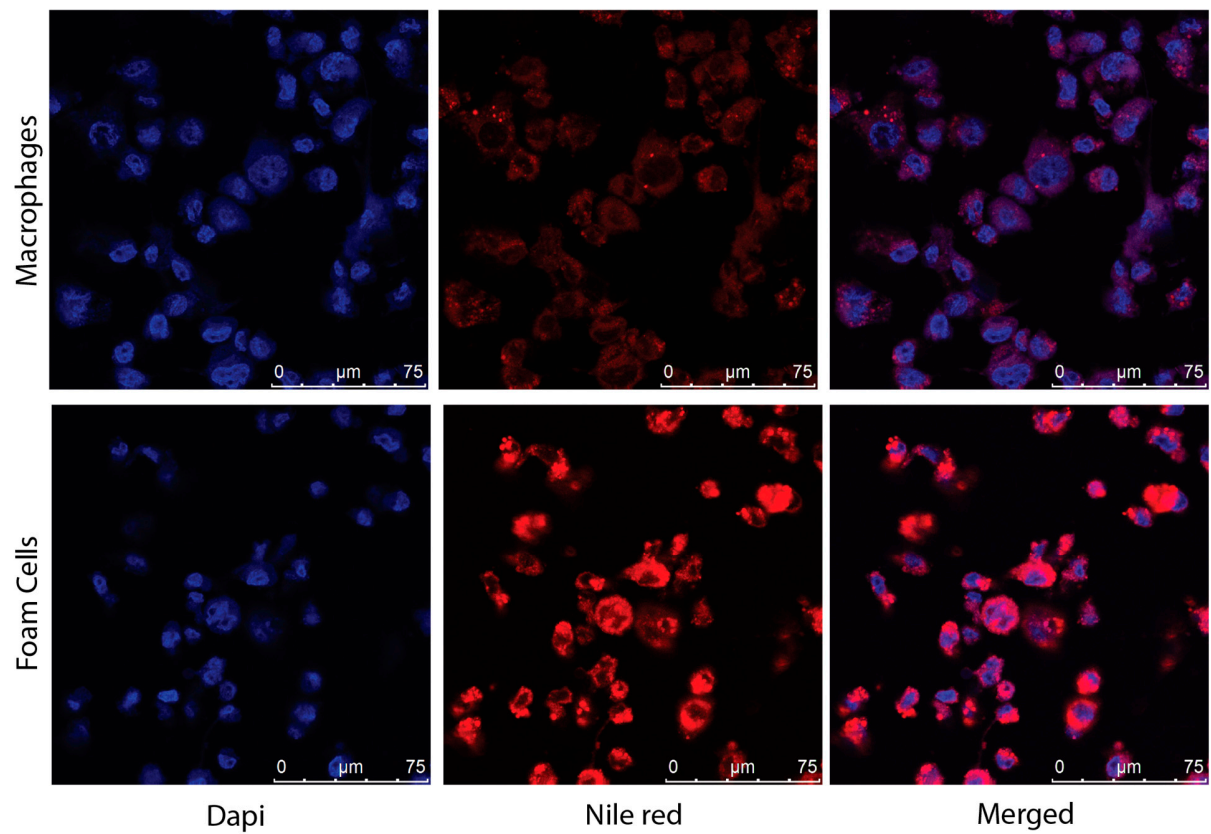

**Figure S3.** Microscopy images of the lipid content within THP1 cells, activated THP1 cells, and foam cells. Lipids were stained with Nile red.



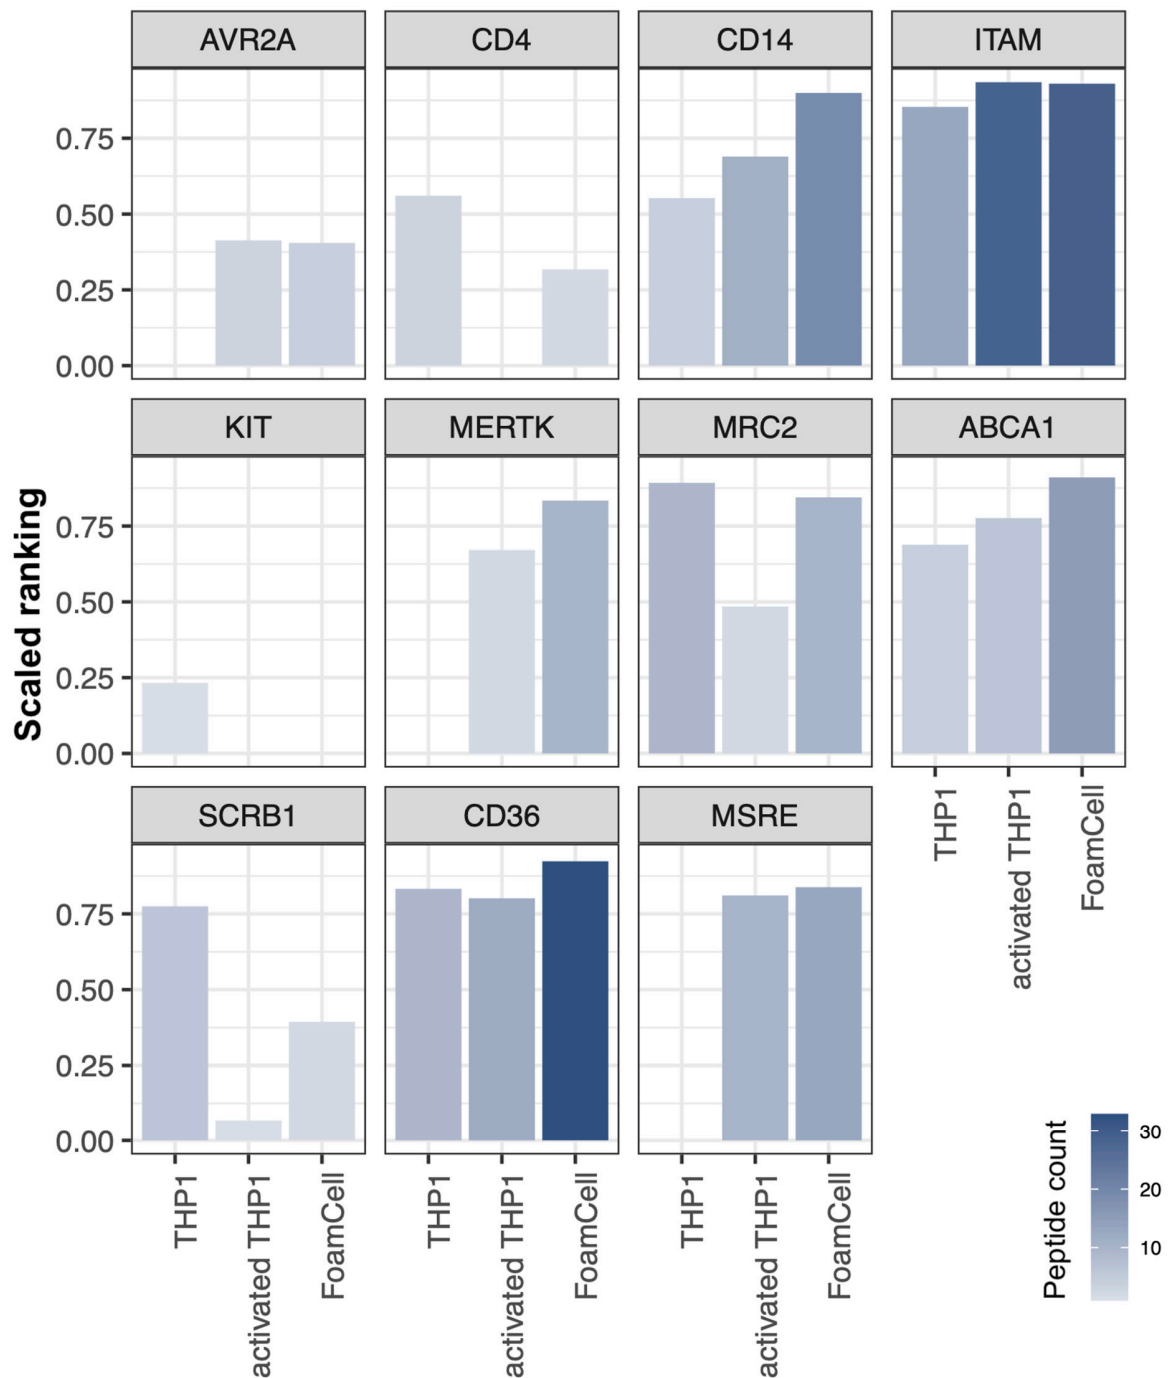

**Figure S4.** Bar charts of selected proteins and their scaled ranked abundances determined with auto-CSC on THP1 cells, activated THP1 cells, and foam cells. Included are proteins previously shown to have altered surface abundance upon THP1 differentiation [1]: AVR2A, CD4, CD14, ITAM, KIT, MERTK, and MRC2. Data for the APOA1/HDL receptors ABCA1 and SCRB1 as well as the oxLDL receptors CD36 and MSRE [2] are also shown.



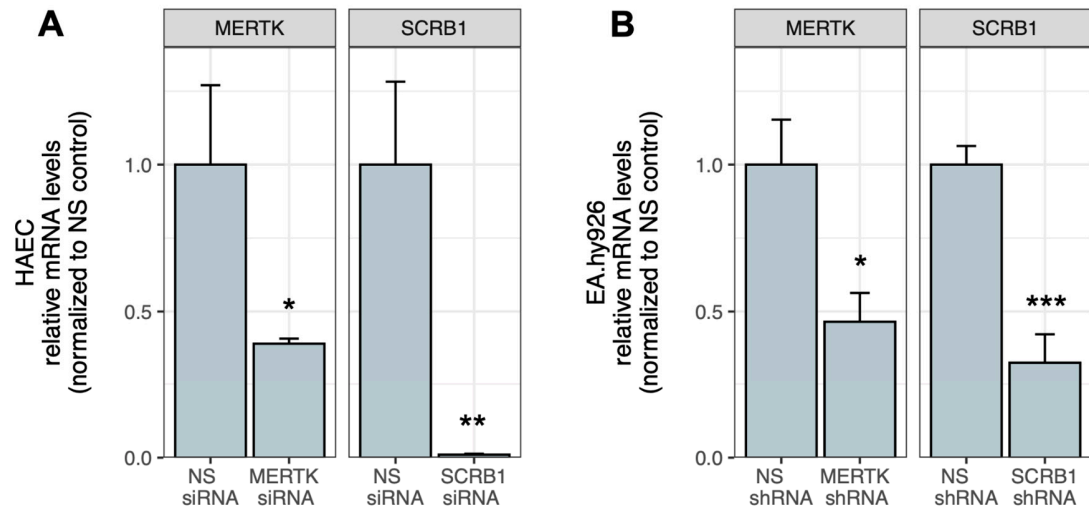

**Figure S5.** mRNA levels upon silencing of *MERTK* and *SCRB1* in EA.hy926 and HAECs. Significance of *MERTK* and *SCRB1* silencing using shRNA in EA.hy926 cells and siRNA in HAECs compared to control cells treated with non-silencing (NS) vector or control, respectively, was assessed with Student's *t*-test (\*  $p < 0.05$ , \*\*  $p < 0.01$ , \*\*\*  $p < 0.001$ ).



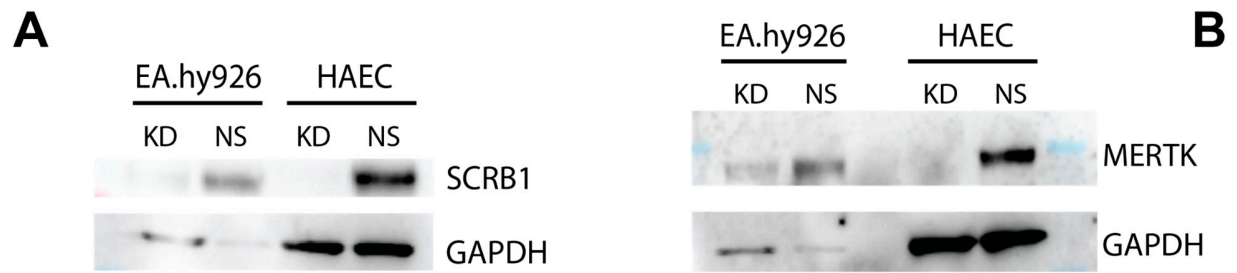

**Figure S6.** Western blot analysis of total protein abundance levels upon silencing of (A) *SCRB1* and (B) *MERTK* in EA.hy926 cells and HAEC with shRNA or siRNA, respectively (KD), and upon treatment with non-silencing controls (NS).



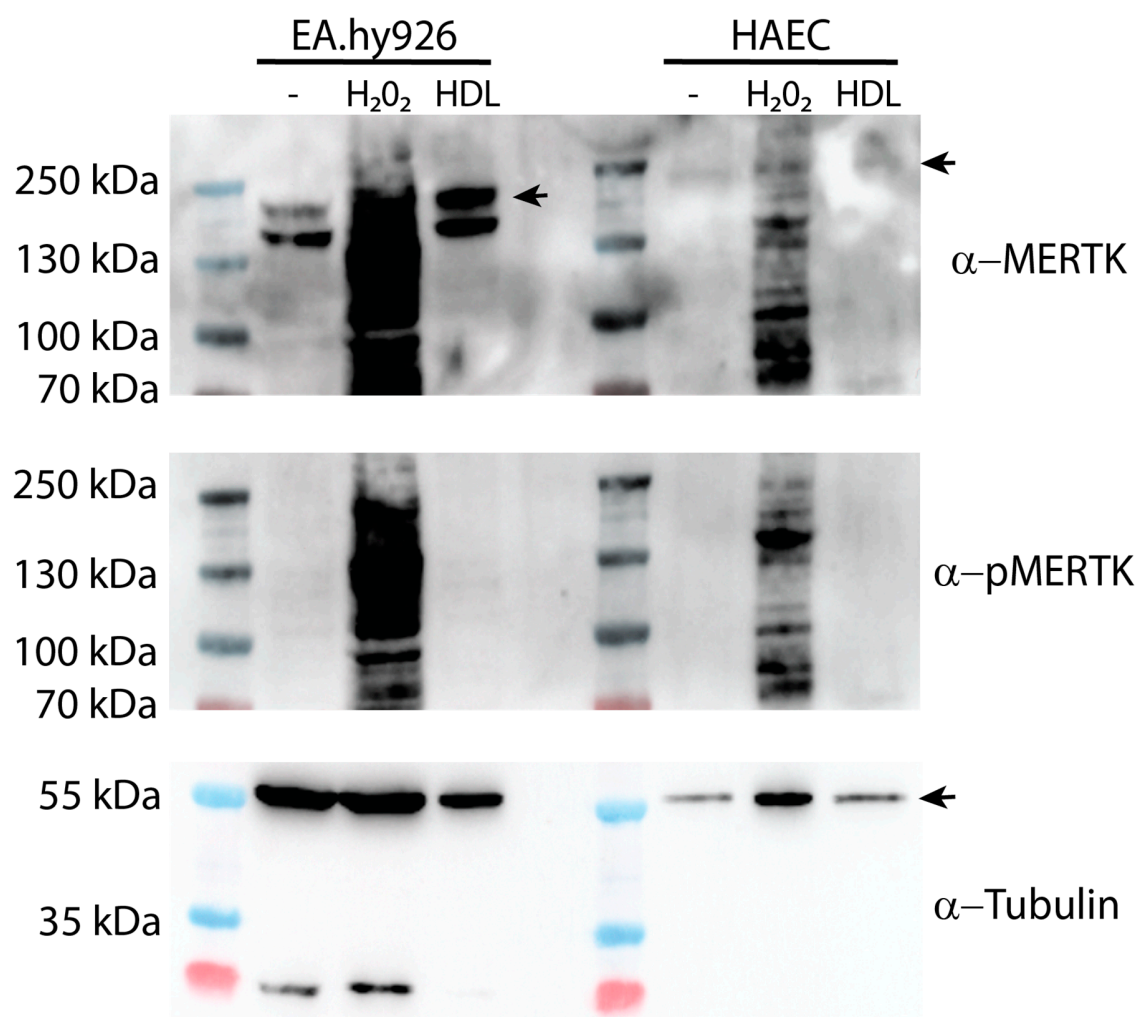

**Figure S7.** Effect of HDL treatment on phosphorylation of MERTK in EA.hy926 cells and HAECs as shown by Western blot. H<sub>2</sub>O<sub>2</sub> treatment served as positive control [3]. Tubulin was used as loading control.



## References:

1. Kalxdorf, M.; Gade, S.; Christian Eberl, H.; Bantscheff, M. Monitoring Cell-surfaceN-Glycoproteome Dynamics by Quantitative Proteomics Reveals Mechanistic Insights into Macrophage Differentiation. *Molecular & Cellular Proteomics* 2017, 16, 770–785.
2. Das, R.; Ganapathy, S.; Mahabeleshwar, G.H.; Drumm, C.; Febbraio, M.; Jain, M.K.; Plow, E.F. Macrophage Gene Expression and Foam Cell Formation Are Regulated by Plasminogen. *Circulation* **2013**, 127, 1209–1218, e1–e16.
3. Anwar, A.; Keating, A.K.; Joung, D.; Sather, S.; Kim, G.K.; Sawczyn, K.K.; Brandão, L.; Henson, P.M.; Graham, D.K. Mer Tyrosine Kinase (MerTK) Promotes Macrophage Survival Following Exposure to Oxidative Stress. *J. Leukoc. Biol.* **2009**, 86, 73–79.
